# Supplementary material for: Phase selective CVD growth and photoinduced 1T → 1H phase transition in a WS2 monolayer
Source: Royal Society of Chemistry journal article supplement (doi:10.1039/d0tc02037k), 2020-01-01
Supplement: d0tc02037k1.pdf [file d0tc02037k1.pdf]

## Supplementary Information

### Phase selective CVD growth and photoinduced 1T→1H phase transition in WS<sub>2</sub> monolayer

Deepa Thakur<sup>1</sup>, Pawan Kumar<sup>1,2</sup> and Viswanath Balakrishnan<sup>1\*</sup>

<sup>1</sup>School of Engineering, Indian Institute of Technology Mandi, Kamand, Himachal Pradesh,  
India-175005

<sup>2</sup>Department of Electrical & System Engineering, University of Pennsylvania, Philadelphia,  
PA, USA-19104

\*Email ID: [viswa@iitmandi.ac.in](mailto:viswa@iitmandi.ac.in)

**Figure S1.** XRD pattern of precursor WO<sub>3</sub> used for growing WS<sub>2</sub>. Pattern is matched with JCPDS file no. 852459; a = 7.324 Å, b = 7.324 Å, c = 7.662 Å with space group of P63/mcm.

**Figure S2.** Deconvolution of Raman Spectrum resolves the E<sub>2g</sub> and 2LA modes in (a) 1T (b) 1H phases of WS<sub>2</sub>.

**Figure S3.** (a) Raman spectra of as grown 1T phase WS<sub>2</sub> obtained at different times. (b) E<sub>2g</sub>/A<sub>1g</sub> ratio calculated at three different flakes showing increasing trend. The observed increase in intensity of E<sub>2g</sub> mode with time, contributing to increased E<sub>2g</sub>/A<sub>1g</sub> ratio might be related to phase change. Raman spectra from around 20 flakes have been analysed in the form of histogram to differentiate the E<sub>2g</sub>/A<sub>1g</sub> ratios of WS<sub>2</sub> before and after conversion from 1T phase to 1H phase(c,d).

**Video 1.** In situ FM imaging shows the systematic changes in intensity across 1T-1H phase transition.

**Table S1.** Shows the calculation of XPS results for W and S peaks for 1T-WS<sub>2</sub> sample (after 24 hours of growth). Calculations indicate mixture of 1T and 1H phase in WS<sub>2</sub>.

**Table S2.** After conversion calculations of XPS results for W and S are as shown. After full transformation phase is 100% 1H.

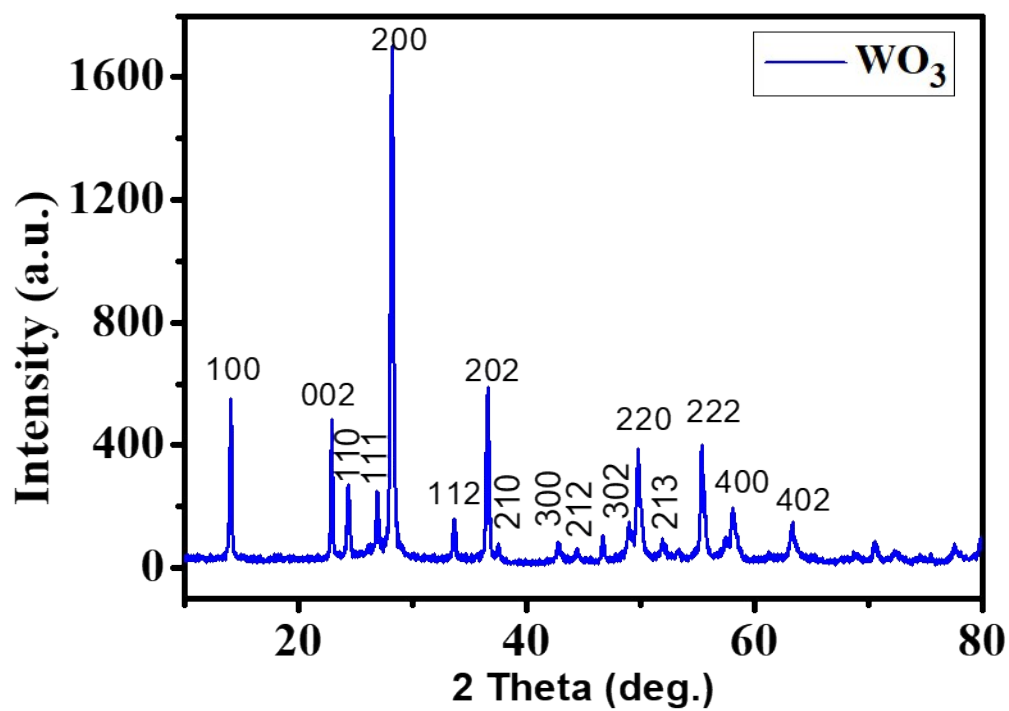

Figure S1. XRD pattern of WO<sub>3</sub> nanorods used for growing WS<sub>2</sub>. Pattern is matched with JCPDS file no. 852459; crystal system is hexagonal,  $a = 7.324 \text{ \AA}$ ,  $b = 7.324 \text{ \AA}$ ,  $c = 7.662 \text{ \AA}$  with space group of P63/mcm.

Fi

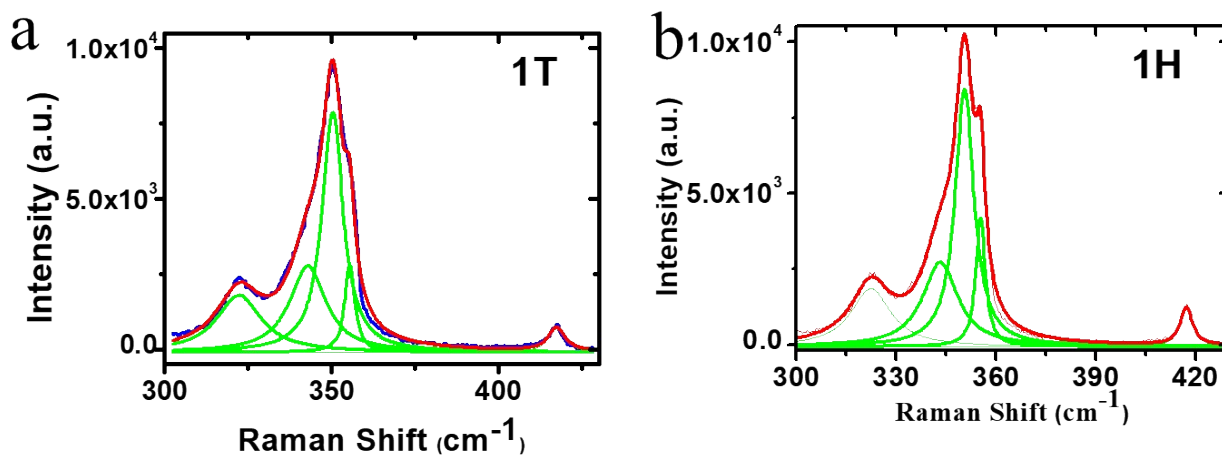

**Figure S2.** Deconvolution of Raman Spectrum resolves the E<sub>2g</sub> and 2LA modes in (a) 1T (b) 1H phases of WS<sub>2</sub>.

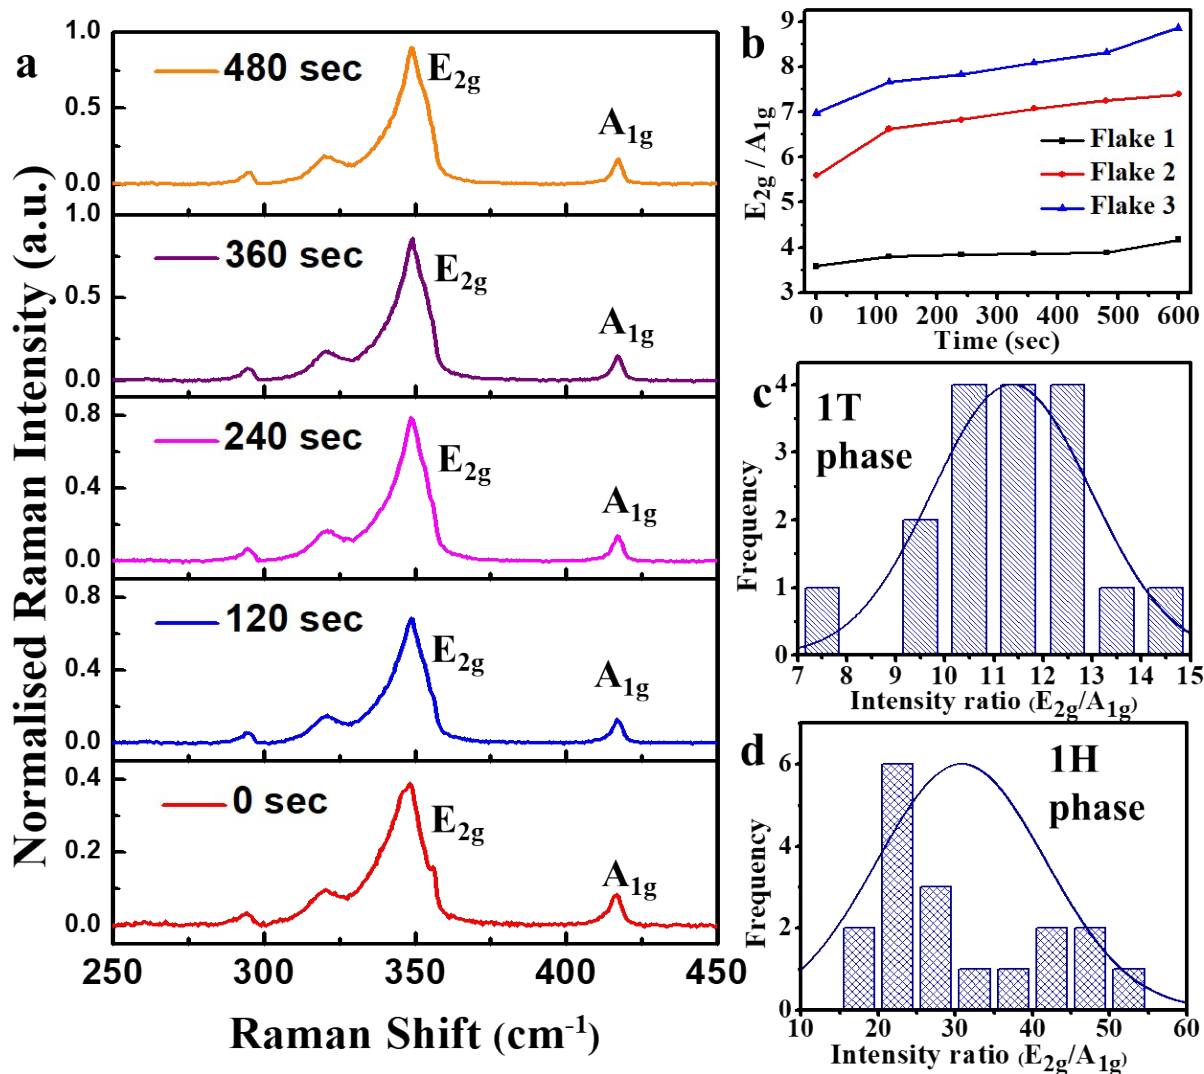

**Figure S3.** (a) Raman spectra of as grown 1T phase  $\text{WS}_2$  obtained at different times. (b)  $E_{2g}/A_{1g}$  ratio calculated at three different flakes showing increasing trend. The observed increase in intensity of  $E_{2g}$  mode with time, contributing to increased  $E_{2g}/A_{1g}$  ratio might be related to phase change. Raman spectra from around 20 flakes have been analysed in the form of histogram to differentiate the  $E_{2g}/A_{1g}$  ratios of  $\text{WS}_2$  before and after conversion from 1T phase to 1H phase(c,d).

| Peak                   | Area     | Intensity (Counts / Sec) | FWHM | Position (eV) | Areal Phase fraction ( $A_{\text{phase}}/A_{1\text{T}} + A_{1\text{H}}$ ) | Peak Shift (eV) |
|------------------------|----------|--------------------------|------|---------------|---------------------------------------------------------------------------|-----------------|
| 1T-W 4f <sub>7/2</sub> | 13039.81 | 7998.44                  | 0.81 | 32.57         | 0.248                                                                     | 0.53            |
| 1H-W 4f <sub>7/2</sub> | 39567.59 | 37597.42                 | 0.83 | 33.10         | 0.752                                                                     |                 |
| 1T-W 4f <sub>5/2</sub> | 9826.611 | 5475.86                  | 0.63 | 34.69         | 0.235                                                                     | 0.57            |
| 1H-W 4f <sub>5/2</sub> | 31955.80 | 28593.17                 | 0.84 | 35.26         | 0.765                                                                     |                 |
| W 5p <sub>3/2</sub>    | 8633.89  | 2064.32                  | 1.15 | 38.61         |                                                                           |                 |
| 1H-S 2p <sub>3/2</sub> | 18903.68 | 18771.79                 | 0.94 | 163.00        | 0.837                                                                     | 0.43            |
| 1T-S 2p <sub>3/2</sub> | 3694.48  | 2299.26                  | 1.52 | 162.57        | 0.163                                                                     |                 |
| 1H-S 2p <sub>1/2</sub> | 9351.58  | 9274.50                  | 0.94 | 164.19        | 0.846                                                                     | 0.35            |
| 1T-S 2p <sub>1/2</sub> | 1698.72  | 1133.65                  | 1.40 | 163.84        | 0.154                                                                     |                 |

**Table S1: Shows the calculation of XPS results for W and S peaks for 1T-WS<sub>2</sub> sample (after 24 hours of growth). Calculations indicates mixture of 1T and 1H phase.**

| Peak                   | Area     | Intensity (Counts / Sec) | FWHM  | Position (eV) |
|------------------------|----------|--------------------------|-------|---------------|
| 1H-S 2p <sub>3/2</sub> | 15634.20 | 17454.66                 | 86.43 | 162.60        |
| 1H-S 2p <sub>1/2</sub> | 7311.04  | 8580.39                  | 86.69 | 163.78        |
| 1H-W 4f <sub>7/2</sub> | 35475.57 | 39991.81                 | 20.31 | 32.97         |
| 1H-W 4f <sub>5/2</sub> | 26284.46 | 28893.39                 | 22.17 | 35.10         |
| W 5p <sub>3/2</sub>    | 3576.89  | 2105.53                  | 21.19 | 38.68         |

**Table S2: After conversion calculations of XPS results for W and S are as shown. After full transformation phase is 100% 1H.**
